# Supplementary material for: The role of structural order and stiffness in the simultaneous enhancement of optical contrast and thermal stability in phase change materials
Source: Royal Society of Chemistry journal article supplement (doi:10.1039/c8tc06409a), 2019-01-01
Supplement: c8tc06409a1.pdf [file c8tc06409a1.pdf]

## SUPPLEMENTARY INFORMATION

### **The role of structural order and stiffness in the simultaneous enhancement of optical contrast and thermal stability in phase change materials**

Qian Li,<sup>a</sup> Kaicheng Xu,<sup>b</sup> Xiaoyi Wang,<sup>c</sup> Haihua Huang,<sup>a</sup> Liang Ma,<sup>a</sup> Chaobin Bi,<sup>a</sup> Zhongbo Yang,<sup>a</sup> Yuankai Li,<sup>a</sup> Yi Zhao,<sup>a</sup> Shihao Fan,<sup>a</sup> Jie Liu<sup>a</sup> and Chaoquan Hu<sup>a,\*</sup>

<sup>a</sup> *State Key Laboratory of Superhard Materials, Key Laboratory of Automobile Materials of MOE, School of Materials Science and Engineering, Jilin University, Changchun 130012, China*

<sup>b</sup> *China-Japan Union Hospital of Jilin University, Changchun, Jilin 130033, China*

<sup>c</sup> *Key Laboratory of Optical System Advanced Manufacturing Technology, Changchun Institute of Optics, Fine Mechanics and Physics, Chinese Academy of Sciences, Changchun 130033, China*

#### **\*Corresponding author.**

E-mail: [cqhu@jlu.edu.cn](mailto:cqhu@jlu.edu.cn) (Prof. Chaoquan Hu)

Tel.: +86-431-85168444

Present address: School of Materials Science and Engineering, Jilin University, Qianjin Street #2699, Changchun 130012, China

#### **This file includes:**

Tables S1-S5

Figures S1-S4

**Table S1** Parameters of fitted spectrum for GeTe and Ge<sub>2</sub>Sb<sub>2</sub>Te<sub>5</sub> films with different  $T_a$ .

| Parameters           | Ge <sub>2</sub> Sb <sub>2</sub> Te <sub>5</sub> | Ge <sub>2</sub> Sb <sub>2</sub> Te <sub>5</sub> | GeTe      | GeTe     |
|----------------------|-------------------------------------------------|-------------------------------------------------|-----------|----------|
|                      | Cub.                                            | Hex.                                            | Rhom. 250 | Cub. 350 |
|                      | 250 °C                                          | 350 °C                                          | °C        | °C       |
| A (eV)               | 148.9                                           | 206.4                                           | 200.9     | 241.4    |
| C (eV)               | 2.36                                            | 1.67                                            | 1.21      | 1.17     |
| E <sub>0</sub> (eV)  | 1.87                                            | 1.83                                            | 1.85      | 1.82     |
| E <sub>g</sub> (eV)  | 0.51                                            | 0.4                                             | 0.64      | 0.63     |
| $\epsilon_{hf}$ (eV) | 4.15                                            | 5.24                                            | 4.91      | 5.78     |

**Table S2** Parameters of fitted Raman spectra for Ge<sub>2</sub>Sb<sub>2</sub>Te<sub>5</sub> and GeTe at  $T_a = 250$  °C and  $T_a = 350$  °C.

|                 |                                                                               | Ge <sub>2</sub> Sb <sub>2</sub> Te <sub>5</sub> Cub. 250 °C |                          |               | Ge <sub>2</sub> Sb <sub>2</sub> Te <sub>5</sub> Hex. 350 °C |                          |               | GeTe Rhom. 250 °C               |                          |               | GeTe Cub. 350 °C                |                          |               |
|-----------------|-------------------------------------------------------------------------------|-------------------------------------------------------------|--------------------------|---------------|-------------------------------------------------------------|--------------------------|---------------|---------------------------------|--------------------------|---------------|---------------------------------|--------------------------|---------------|
| Peak assignment | Peak identity                                                                 | Raman shift (cm <sup>-1</sup> )                             | FWHM (cm <sup>-1</sup> ) | Peak area (%) | Raman shift (cm <sup>-1</sup> )                             | FWHM (cm <sup>-1</sup> ) | Peak area (%) | Raman shift (cm <sup>-1</sup> ) | FWHM (cm <sup>-1</sup> ) | Peak area (%) | Raman shift (cm <sup>-1</sup> ) | FWHM (cm <sup>-1</sup> ) | Peak area (%) |
| P <sub>2</sub>  | Octahedral Ge                                                                 | 95                                                          | 25.7                     | 26.1          | 95                                                          | 23.9                     | 27.8          | 95                              | 23.7                     | 27.2          | 95                              | 22.9                     | 29.7          |
| P <sub>3</sub>  | GeTe <sub>4-n</sub> Ge <sub>n</sub> ( $n = 0$ )<br>corner shared tetrahedra   | 112                                                         | 26.5                     | 14.1          | 113                                                         | 20.2                     | 12.9          | 112                             | 23.0                     | 21.1          | 112                             | 19.5                     | 20.0          |
| P <sub>4</sub>  | Distorted octahedral Ge + defective octahedral Ge                             | 126                                                         | 35.6                     | 19.9          | 132                                                         | 26.2                     | 19.3          | 127                             | 30.1                     | 23.7          | 128                             | 29.1                     | 19.6          |
| P <sub>5</sub>  | Defective octahedral Ge                                                       |                                                             |                          |               |                                                             |                          |               | 156                             | 28.3                     | 8.1           | 156                             | 25.7                     | 8.9           |
| P <sub>6</sub>  | GeTe <sub>4-n</sub> Ge <sub>n</sub> ( $n = 1, 2$ )<br>edge-sharing tetrahedra | 181                                                         | 42.0                     | 13.7          | 186                                                         | 35.3                     | 14.2          | 180                             | 39.2                     | 6.7           | 183                             | 26.8                     | 7.0           |
| P <sub>7</sub>  | GeTe <sub>4-n</sub> Ge <sub>n</sub> ( $n = 2$ )<br>corner shared tetrahedra   | 236                                                         | 71.3                     | 10.4          | 233                                                         | 49.9                     | 10.5          | 231                             | 85.1                     | 13.2          | 183                             | 26.8                     | 7.0           |
| P <sub>11</sub> | Sb-Te vibrations in cubic Sb <sub>2</sub> Te <sub>3</sub> units               | 150                                                         | 34.4                     | 15.7          |                                                             |                          |               |                                 |                          |               |                                 |                          |               |
| P <sub>12</sub> | Mode of hexagonal Sb <sub>2</sub> Te <sub>3</sub> phase                       |                                                             |                          |               | 159                                                         | 25.2                     | 15.5          |                                 |                          |               |                                 |                          |               |

**Table S3** Parameters of fitted Raman spectra for GeTe at as-deposited (as-dep.),  $T_a = 250$  °C and  $T_a = 350$  °C.

| Peak assignment | Peak identity                                                              | GeTe Amor. As-dep.  |                     |           | GeTe Rhom. 250 °C   |                     |           | GeTe Cub. 350 °C    |                     |           |
|-----------------|----------------------------------------------------------------------------|---------------------|---------------------|-----------|---------------------|---------------------|-----------|---------------------|---------------------|-----------|
|                 |                                                                            | Raman shift         | FWHM                | Peak area | Raman shift         | FWHM                | Peak area | Raman shift         | FWHM                | Peak area |
|                 |                                                                            | (cm <sup>-1</sup> ) | (cm <sup>-1</sup> ) | (%)       | (cm <sup>-1</sup> ) | (cm <sup>-1</sup> ) | (%)       | (cm <sup>-1</sup> ) | (cm <sup>-1</sup> ) | (%)       |
| P <sub>1</sub>  | Symmetric bending mode of GeTe <sub>4</sub>                                | 91                  | 20.2                | 5.9       |                     |                     |           |                     |                     |           |
| P <sub>2</sub>  | Octahedral Ge                                                              |                     |                     |           | 95                  | 23.7                | 27.2      | 95                  | 22.9                | 29.7      |
| P <sub>3</sub>  | GeTe <sub>4+n</sub> Ge <sub>n</sub> ( $n = 0$ ) corner shared tetrahedra   | 112                 | 34.3                | 27.5      | 112                 | 23.0                | 21.1      | 112                 | 19.5                | 20.0      |
| P <sub>4</sub>  | Distorted octahedral Ge + defective octahedral Ge                          | 129                 | 56.2                | 23.1      | 127                 | 30.1                | 23.7      | 128                 | 29.1                | 19.6      |
| P <sub>5</sub>  | Defective octahedral Ge                                                    | 156                 | 42.4                | 15.7      | 156                 | 28.3                | 8.1       | 156                 | 25.7                | 8.9       |
| P <sub>6</sub>  | GeTe <sub>4+n</sub> Ge <sub>n</sub> ( $n = 1, 2$ ) edge-sharing tetrahedra | 190                 | 53.7                | 14.2      | 180                 | 39.2                | 6.7       | 183                 | 26.8                | 7.0       |
| P <sub>7</sub>  | GeTe <sub>4+n</sub> Ge <sub>n</sub> ( $n = 2$ ) Corner shared tetrahedra   | 236                 | 65.6                | 13.6      | 231                 | 85.1                | 13.2      | 183                 | 26.8                | 7.0       |

**Table S4** Parameters of fitted Raman spectra for GeTe<sub>4</sub> at as-deposited (as-dep.),  $T_a = 250$  °C and  $T_a = 350$  °C.

| Peak assignment | Peak identity                                                            | GeTe <sub>4</sub> Amor. As-dep. |                     |           | GeTe <sub>4</sub> Rhom. 250 °C |                     |           | GeTe <sub>4</sub> Cub. 350 °C |                     |           |
|-----------------|--------------------------------------------------------------------------|---------------------------------|---------------------|-----------|--------------------------------|---------------------|-----------|-------------------------------|---------------------|-----------|
|                 |                                                                          | Raman shift                     | FWHM                | Peak area | Raman shift                    | FWHM                | Peak area | Raman shift                   | FWHM                | Peak area |
|                 |                                                                          | (cm <sup>-1</sup> )             | (cm <sup>-1</sup> ) | (%)       | (cm <sup>-1</sup> )            | (cm <sup>-1</sup> ) | (%)       | (cm <sup>-1</sup> )           | (cm <sup>-1</sup> ) | (%)       |
| P <sub>1</sub>  | Symmetric bending mode of GeTe <sub>4</sub>                              | 91                              | 20.6                | 8.5       |                                |                     |           |                               |                     |           |
| P <sub>2</sub>  | Octahedral Ge                                                            |                                 |                     |           | 94                             | 19.3                | 11.4      | 95                            | 24.3                | 20.3      |
| P <sub>3</sub>  | GeTe <sub>4-n</sub> Ge <sub>n</sub> ( $n = 0$ ) corner shared tetrahedra | 112                             | 25.2                | 13.5      | 112                            | 9.8                 | 23.1      | 112                           | 10.5                | 22.0      |
| P <sub>4</sub>  | Distorted octahedral Ge + defective octahedral Ge                        | 123                             | 14.3                | 15.3      |                                |                     |           |                               |                     |           |
| P <sub>5</sub>  | Defective octahedral Ge                                                  |                                 |                     |           | 154                            | 47.4                | 10.7      | 156                           | 53.5                | 17.2      |
| P <sub>7</sub>  | GeTe <sub>4-n</sub> Ge <sub>n</sub> ( $n = 2$ ) Corner shared tetrahedra | 217                             | 104.4               | 21.6      | 228                            | 80.1                | 7.1       | 221                           | 71.5                | 12.3      |
| P <sub>8</sub>  | Vibrations of short disordered Te-Te chains                              | 149                             | 33.1                | 41.0      |                                |                     |           |                               |                     |           |
| P <sub>9</sub>  | c-GeTe <sub>4</sub>                                                      |                                 |                     |           | 119                            | 9.8                 | 30.3      | 119                           | 9.3                 | 16.4      |
| P <sub>10</sub> | Crystalline Te vibrations                                                |                                 |                     |           | 135                            | 13.5                | 17.4      | 133                           | 12.7                | 11.7      |

**Table S5** Parameters of fitted spectrum for GeTe<sub>4</sub> films at  $T_a = 250$  °C and  $T_a = 350$  °C.

| Parameters              | GeTe <sub>4</sub> Cub. 250°C | GeTe <sub>4</sub> Cub. 350°C |
|-------------------------|------------------------------|------------------------------|
| A (eV)                  | 138.5                        | 112.0                        |
| C (eV)                  | 1.46                         | 2.03                         |
| E <sub>0</sub> (eV)     | 1.92                         | 1.85                         |
| E <sub>g</sub> (eV)     | 0.67                         | 0.63                         |
| $\varepsilon_{hf}$ (eV) | 4.73                         | 4.36                         |

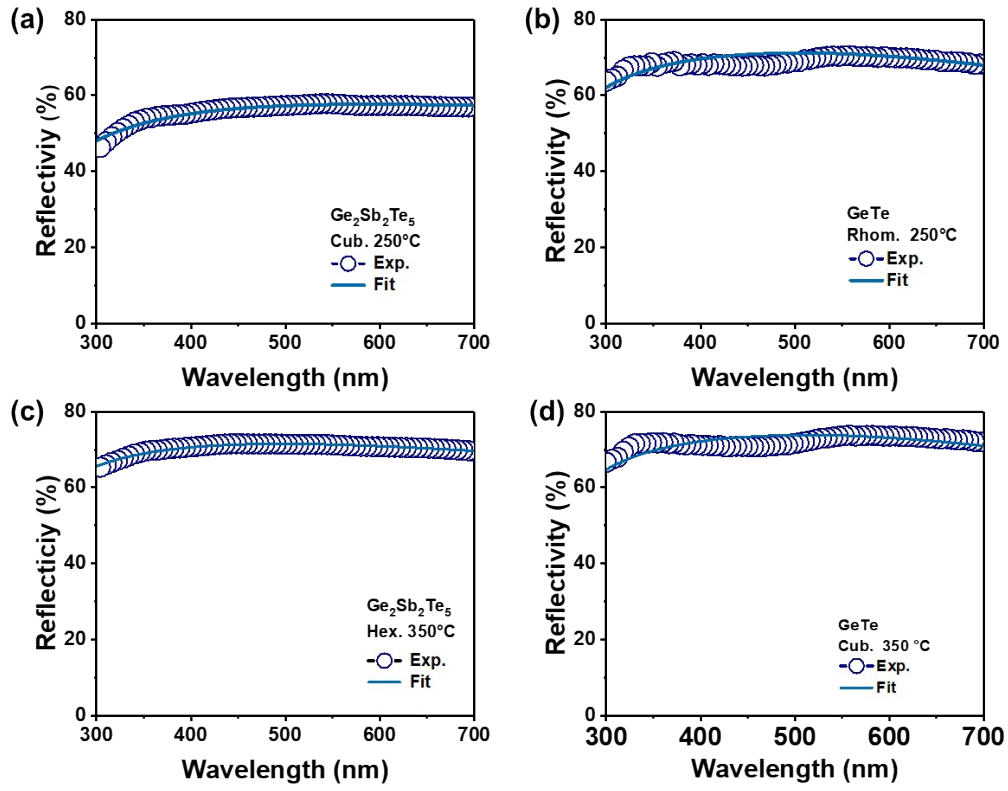

**Fig. S1** The experimental and fitted reflectance spectra for (a) Ge<sub>2</sub>Sb<sub>2</sub>Te<sub>5</sub> and (b) GeTe films at  $T_a = 250$  °C. The experimental and fitted reflectance spectra for (c) Ge<sub>2</sub>Sb<sub>2</sub>Te<sub>5</sub> and (d) GeTe films  $T_a = 350$  °C.

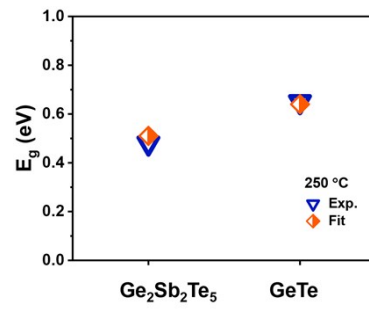

**Fig. S2** The experimental and fitted optical bandgap for  $\text{Ge}_2\text{Sb}_2\text{Te}_5$  and  $\text{GeTe}$  films at  $T_a = 250$  °C.



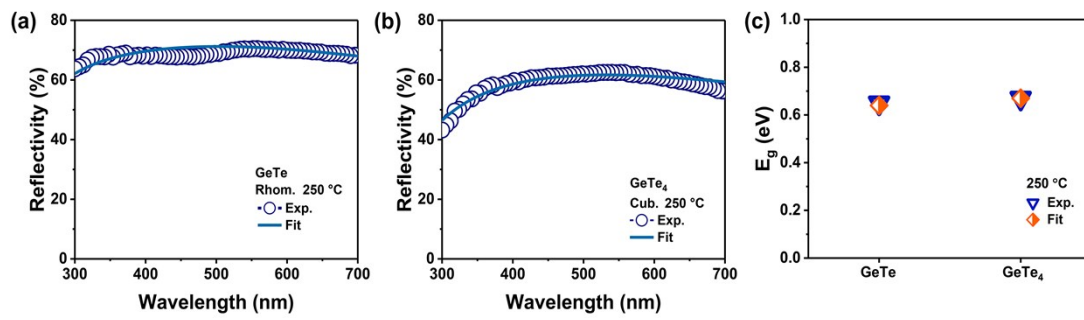

**Fig. S3** The experimental and fitted reflectance spectrum for GeTe (a) and GeTe<sub>4</sub> (b) films at  $T_a = 250$  °C. (c) The experimental and fitted optical bandgap for GeTe and GeTe<sub>4</sub> films at  $T_a = 250$  °C.

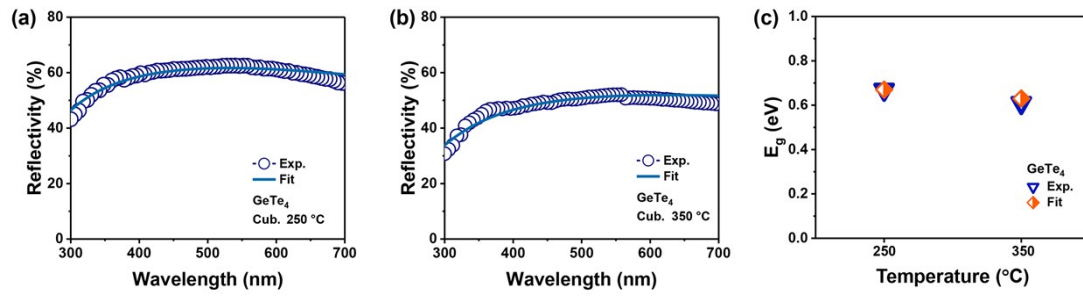

**Fig. S4** The experimental and fitted reflectance spectrum for GeTe<sub>4</sub> films at  $T_a = 250$  °C (a) and  $T_a = 350$  °C (b). (c) The experimental and fitted optical bandgap for GeTe<sub>4</sub> films at  $T_a = 250$  °C and  $T_a = 350$  °C.
